# Supplementary material for: Porcine Circovirus Modulates Swine Influenza Virus Replication in Pig Tracheal Epithelial Cells and Porcine Alveolar Macrophages
Source: MDPI journal article supplement (doi:10.3390/v15051207), 2023-05-20
Supplement: s1 [file s1]

**Supplemental Table S2. Up-regulated genes in NPTr cells**

| <b>PCV2b/H1N1</b>       |             | <b>PCV2b</b>            |             | <b>H1N1</b>             |             |
|-------------------------|-------------|-------------------------|-------------|-------------------------|-------------|
| Gene ID                 | Fold change | Gene ID                 | Fold change | Gene ID                 | Fold change |
| PRDM5                   | 250,86      | CCK                     | 161,38      | SERPINH1                | 12,97       |
| CHRNA                   | 99,44       | PRDM5                   | 101,99      | SDCBP                   | 10,46       |
| CXCL8                   | 96,60       | TGFB3                   | 20,66       | gene:ENSSSCG00000001917 | 9,15        |
| CXCL2                   | 65,63       | gene:ENSSSCG00000046628 | 18,52       | PSMB1                   | 7,91        |
| CCK                     | 62,28       | CXCL2                   | 17,51       | gene:ENSSSCG00000012119 | 6,77        |
| VAT1L                   | 53,32       | PPP1R14C                | 17,45       | NDRG1                   | 6,51        |
| gene:ENSSSCG00000046628 | 31,74       | DNAJB6                  | 11,12       | TACSTD2                 | 5,61        |
| LTF                     | 29,40       | PSPH                    | 11,12       | SLC25A3                 | 5,27        |
| PPP1R14C                | 24,66       | SNRPA1                  | 10,20       | CCN1                    | 5,21        |
| PROK2                   | 22,62       | PPP1R10                 | 9,29        | FADS2                   | 5,03        |
| CCN2                    | 22,03       | TNIP3                   | 9,28        | MRFAP1                  | 4,87        |
| PSPH                    | 21,36       | EDN1                    | 9,02        | TAX1BP3                 | 4,35        |
| IQUB                    | 19,57       | DDX52                   | 8,64        | SLC50A1                 | 4,30        |
| ALYREF                  | 19,44       | ZNF646                  | 8,51        | ERBB3                   | 4,20        |
| NPM3                    | 18,04       | CSKMT                   | 7,95        | MGST3                   | 4,04        |
| IL1A                    | 17,54       | gene:ENSSSCG00000047320 | 7,22        | IGFBP2                  | 3,86        |
| SRSF7                   | 16,52       | ZNF131                  | 6,99        | gene:ENSSSCG00000035570 | 3,86        |
| MRPL15                  | 15,61       | DUSP4                   | 6,57        | UNC5B                   | 3,83        |
| PLAU                    | 14,81       | SGK1                    | 6,53        | ITM2C                   | 3,83        |
| CDC42SE1                | 14,20       | TRIB3                   | 6,53        | SKP1                    | 3,73        |
| SEC61G                  | 14,12       | RCSD1                   | 6,51        | FHL2                    | 3,72        |
| SDCBP                   | 13,51       | ZNF12                   | 5,88        | CLDN1                   | 3,69        |
| TNIP3                   | 13,13       | NCLN                    | 5,79        | LGALS3                  | 3,55        |
| RCSD1                   | 13,09       | MAGOH                   | 5,79        | PTP4A1                  | 3,54        |
| P2RY1                   | 12,59       | SRSF6                   | 5,75        | ATP5PO                  | 3,45        |
| CSKMT                   | 12,50       | ZC3H12A                 | 5,74        | PRKAR1A                 | 3,45        |
| CCN1                    | 12,21       | ODC1                    | 5,49        | ESD                     | 3,33        |
| SGK1                    | 11,82       | UBTF                    | 5,45        | PICALM                  | 3,32        |
| ZNF646                  | 11,71       | CUTC                    | 5,45        | FTL                     | 3,28        |
| NSFL1C                  | 11,71       | SLC38A2                 | 5,18        | NDUFC2                  | 3,26        |
| gene:ENSSSCG00000012119 | 10,95       | GIPC1                   | 5,05        | PFKFB3                  | 3,22        |
| CHCHD1                  | 10,89       | gene:ENSSSCG00000033786 | 4,74        | HINT1                   | 3,17        |
| ART4                    | 10,64       | HSPH1                   | 4,50        | PGK1                    | 3,11        |
| SNRPA1                  | 10,09       | PTGS2                   | 4,42        | MMP13                   | 3,09        |
| GPATCH4                 | 9,91        | MED9                    | 4,38        | PPP1CB                  | 3,08        |

|                         |      |                         |      |                         |      |
|-------------------------|------|-------------------------|------|-------------------------|------|
| DDX52                   | 9,86 | AMD1                    | 4,32 | NIBAN2                  | 3,07 |
| ANKRD49                 | 9,28 | ANKRD1                  | 4,27 | DDR1                    | 3,05 |
| gene:ENSSSCG00000051136 | 9,02 | SAFB2                   | 4,26 | UBB                     | 2,81 |
| ODC1                    | 8,82 | PPP1R15A                | 4,25 | WASL                    | 2,80 |
| TRIB3                   | 8,79 | ETS2                    | 4,21 | HPS5                    | 2,80 |
| NUDT16                  | 8,73 | gene:ENSSSCG00000016733 | 4,11 | RPS29                   | 2,80 |
| MRPS18C                 | 8,68 | PCLAF                   | 3,90 | gene:ENSSSCG00000017509 | 2,76 |
| ZNF639                  | 8,68 | TNFSF9                  | 3,75 | PSAP                    | 2,60 |
| gene:ENSSSCG00000044847 | 8,36 | AAK1                    | 3,75 | ITM2B                   | 2,58 |
| RND1                    | 8,35 | MAFF                    | 3,74 | gene:ENSSSCG00000007743 | 2,57 |
| CCNB1IP1                | 8,22 | SYS1                    | 3,73 | DDIT4                   | 2,57 |
| DUSP4                   | 8,21 | WDR74                   | 3,66 | HES1                    | 2,54 |
| SLC38A2                 | 8,07 | BRIX1                   | 3,66 | MMP7                    | 2,46 |
| H2AFZ                   | 7,86 | NOP56                   | 3,66 | MAL2                    | 2,41 |
| MAGOH                   | 7,85 | HSPA8                   | 3,65 | gene:ENSSSCG00000014071 | 2,35 |
| DUSP5                   | 7,64 | ELOA                    | 3,64 | gene:ENSSSCG00000004489 | 2,33 |
| MMP13                   | 7,63 | NOP58                   | 3,63 | NFKBIA                  | 2,29 |
| OSTC                    | 7,46 | TNFAIP3                 | 3,62 | CST3                    | 2,27 |
| SEMA7A                  | 7,45 | PEDS1                   | 3,59 | gene:ENSSSCG00000005453 | 2,22 |
| TGFBR3                  | 7,40 | gene:ENSSSCG00000022322 | 3,52 | gene:ENSSSCG00000033697 | 2,22 |
| PSMB1                   | 7,36 | MUC13                   | 3,52 | RAC1                    | 2,15 |
| PPP1R15A                | 7,06 | PEA15                   | 3,46 | RPLP0                   | 2,12 |
| NOP58                   | 6,97 | ZNF207                  | 3,44 | PMEP1A                  | 2,09 |
| THOC6                   | 6,81 | GATAD2A                 | 3,41 | RPL23                   | 2,04 |
| gene:ENSSSCG00000030300 | 6,70 | TCF7L2                  | 3,37 | RPS3A                   | 2,00 |
| UGCG                    | 6,69 | PDRG1                   | 3,24 | RPS25                   | 2,00 |
| CTSC                    | 6,65 | GID4                    | 3,23 | ALDH1A1                 | 2,00 |
| DYNLT1                  | 6,59 | STK4                    | 3,13 | RPS7                    | 1,97 |
| WDR74                   | 6,41 | RNF44                   | 3,12 | RPL34                   | 1,95 |
| PNO1                    | 6,39 | gene:ENSSSCG00000034711 | 3,11 | EIF3E                   | 1,95 |
| MCL1                    | 6,38 | gene:ENSSSCG00000011803 | 3,10 | TPT1                    | 1,91 |
| PTGS2                   | 6,38 | MKNK2                   | 3,10 | RPL27                   | 1,85 |
| RELA                    | 6,21 | RNPS1                   | 3,07 | LAPTM4A                 | 1,83 |
| CDC42EP3                | 6,19 | CTR9                    | 3,06 | ENO1                    | 1,82 |
| SRSF6                   | 6,17 | CTSC                    | 3,03 | SPP1                    | 1,81 |
| NLRP3                   | 6,16 | SAT1                    | 2,94 | ZFP36L2                 | 1,80 |
| EDN1                    | 6,12 | SRXN1                   | 2,89 |                         |      |
| NOP56                   | 6,09 | RBM8A                   | 2,89 |                         |      |
| SAFB2                   | 6,08 | ZNFX1                   | 2,87 |                         |      |
| AMD1                    | 6,07 | POLR3D                  | 2,79 |                         |      |
| KRT10                   | 6,03 | DDX23                   | 2,79 |                         |      |

|                         |      |                         |      |  |  |
|-------------------------|------|-------------------------|------|--|--|
| PCLAF                   | 5,91 | EIF3J                   | 2,78 |  |  |
| gene:ENSSSCG00000050998 | 5,86 | ING3                    | 2,75 |  |  |
| MLLT11                  | 5,86 | PSMD7                   | 2,73 |  |  |
| HILPDA                  | 5,84 | R3HDM4                  | 2,65 |  |  |
| gene:ENSSSCG00000032059 | 5,82 | ZFP36L1                 | 2,62 |  |  |
| ZNF131                  | 5,76 | FUNDC2                  | 2,61 |  |  |
| AKAP8                   | 5,76 | DHX38                   | 2,60 |  |  |
| MRPL43                  | 5,76 | TXNIP                   | 2,58 |  |  |
| PNP                     | 5,74 | ETV3                    | 2,58 |  |  |
| TIMM8B                  | 5,59 | SQSTM1                  | 2,48 |  |  |
| TMEM87B                 | 5,51 | DDX3X                   | 2,42 |  |  |
| CLDN1                   | 5,43 | IDI1                    | 2,35 |  |  |
| TACSTD2                 | 5,36 | HBEGF                   | 2,34 |  |  |
| FERMT1                  | 5,31 | gene:ENSSSCG00000009211 | 2,33 |  |  |
| AAK1                    | 5,30 | IER3                    | 2,29 |  |  |
| NFKBIA                  | 5,27 | TM4SF1                  | 2,29 |  |  |
| gene:ENSSSCG00000029160 | 5,22 | MT1A                    | 2,21 |  |  |
| RBP4                    | 5,19 | PSMD8                   | 2,17 |  |  |
| EIF3J                   | 5,16 | FNDCC7                  | 2,17 |  |  |
| TRAPPC8                 | 5,15 | UBE2Q1                  | 2,08 |  |  |
| TFRC                    | 5,15 | CD24                    | 1,95 |  |  |
| CUTC                    | 5,15 | COX1                    | 1,89 |  |  |
| TNFSF9                  | 5,14 |                         |      |  |  |
| HSPA8                   | 5,13 |                         |      |  |  |
| gene:ENSSSCG00000009211 | 5,11 |                         |      |  |  |
| PRNP                    | 5,04 |                         |      |  |  |
| PEDS1                   | 5,02 |                         |      |  |  |
| S100A8                  | 4,83 |                         |      |  |  |
| gene:ENSSSCG00000047320 | 4,81 |                         |      |  |  |
| GRPEL2                  | 4,76 |                         |      |  |  |
| gene:ENSSSCG00000017626 | 4,76 |                         |      |  |  |
| RPL7L1                  | 4,73 |                         |      |  |  |
| RAN                     | 4,67 |                         |      |  |  |
| CYCS                    | 4,64 |                         |      |  |  |
| ELOA                    | 4,59 |                         |      |  |  |
| MED9                    | 4,51 |                         |      |  |  |
| POLR2G                  | 4,49 |                         |      |  |  |
| SMCR8                   | 4,48 |                         |      |  |  |
| gene:ENSSSCG00000011803 | 4,47 |                         |      |  |  |
| gene:ENSSSCG00000014031 | 4,43 |                         |      |  |  |
| SNRPG                   | 4,42 |                         |      |  |  |

|                          |      |  |  |  |  |
|--------------------------|------|--|--|--|--|
| TRA2A                    | 4,39 |  |  |  |  |
| gene:ENSSSCG00000005478  | 4,30 |  |  |  |  |
| gene:ENSSSCG000000033786 | 4,21 |  |  |  |  |
| TXNIP                    | 4,20 |  |  |  |  |
| SRSF3                    | 4,15 |  |  |  |  |
| gene:ENSSSCG000000022322 | 4,12 |  |  |  |  |
| ERBB3                    | 4,12 |  |  |  |  |
| TRA2B                    | 4,11 |  |  |  |  |
| RNF220                   | 4,10 |  |  |  |  |
| ZC3H12A                  | 4,07 |  |  |  |  |
| RNF19B                   | 4,03 |  |  |  |  |
| NDUFB1                   | 4,03 |  |  |  |  |
| MPHOSPH10                | 4,03 |  |  |  |  |
| HSPH1                    | 4,01 |  |  |  |  |
| HINT1                    | 4,00 |  |  |  |  |
| MRFAP1                   | 3,98 |  |  |  |  |
| OSER1                    | 3,89 |  |  |  |  |
| RNF126                   | 3,87 |  |  |  |  |
| TRMT13                   | 3,81 |  |  |  |  |
| NADK                     | 3,79 |  |  |  |  |
| LGALS3                   | 3,76 |  |  |  |  |
| VMP1                     | 3,68 |  |  |  |  |
| ITPRID2                  | 3,67 |  |  |  |  |
| PSMD12                   | 3,65 |  |  |  |  |
| SREK1IP1                 | 3,54 |  |  |  |  |
| EXOSC1                   | 3,49 |  |  |  |  |
| PPP1R14B                 | 3,49 |  |  |  |  |
| PTP4A1                   | 3,46 |  |  |  |  |
| RIT1                     | 3,41 |  |  |  |  |
| DKC1                     | 3,36 |  |  |  |  |
| gene:ENSSSCG000000039071 | 3,33 |  |  |  |  |
| RNPS1                    | 3,32 |  |  |  |  |
| SNRPB                    | 3,31 |  |  |  |  |
| EREG                     | 3,28 |  |  |  |  |
| HNRNPA0                  | 3,27 |  |  |  |  |
| MAP2K3                   | 3,27 |  |  |  |  |
| gene:ENSSSCG000000040889 | 3,26 |  |  |  |  |
| RBM8A                    | 3,25 |  |  |  |  |
| SLIRP                    | 3,23 |  |  |  |  |
| DHRS9                    | 3,23 |  |  |  |  |
| PSMD7                    | 3,20 |  |  |  |  |

|                         |      |  |  |  |  |
|-------------------------|------|--|--|--|--|
| BRD2                    | 3,20 |  |  |  |  |
| PABPN1                  | 3,19 |  |  |  |  |
| TM4SF1                  | 3,18 |  |  |  |  |
| MAP7D1                  | 3,14 |  |  |  |  |
| HNRNPC                  | 3,13 |  |  |  |  |
| PBDC1                   | 3,07 |  |  |  |  |
| ITM2B                   | 3,04 |  |  |  |  |
| HNRNPA3                 | 3,04 |  |  |  |  |
| YTHDF2                  | 3,04 |  |  |  |  |
| DDX3X                   | 3,00 |  |  |  |  |
| KRR1                    | 2,96 |  |  |  |  |
| DENND2C                 | 2,95 |  |  |  |  |
| IFNAR1                  | 2,94 |  |  |  |  |
| DDX21                   | 2,87 |  |  |  |  |
| gene:ENSSSCG00000038359 | 2,84 |  |  |  |  |
| DDX5                    | 2,84 |  |  |  |  |
| gene:ENSSSCG0000003079  | 2,83 |  |  |  |  |
| SYS1                    | 2,78 |  |  |  |  |
| FHAD1                   | 2,74 |  |  |  |  |
| DNAJA1                  | 2,73 |  |  |  |  |
| BRIX1                   | 2,72 |  |  |  |  |
| H2AZ2                   | 2,72 |  |  |  |  |
| SMIM7                   | 2,71 |  |  |  |  |
| gene:ENSSSCG00000005453 | 2,69 |  |  |  |  |
| USP1                    | 2,69 |  |  |  |  |
| PTBP1                   | 2,68 |  |  |  |  |
| gene:ENSSSCG00000034572 | 2,68 |  |  |  |  |
| THBS1                   | 2,62 |  |  |  |  |
| DDX27                   | 2,61 |  |  |  |  |
| MCM4                    | 2,58 |  |  |  |  |
| ETS2                    | 2,54 |  |  |  |  |
| ZFP36L1                 | 2,50 |  |  |  |  |
| ZNFX1                   | 2,49 |  |  |  |  |
| COX7A2                  | 2,49 |  |  |  |  |
| RTF1                    | 2,48 |  |  |  |  |
| POLR2K                  | 2,46 |  |  |  |  |
| PEA15                   | 2,41 |  |  |  |  |
| COX1                    | 2,39 |  |  |  |  |
| EMP1                    | 2,39 |  |  |  |  |
| ETF1                    | 2,38 |  |  |  |  |
| MT1A                    | 2,37 |  |  |  |  |

|                         |      |  |  |  |  |
|-------------------------|------|--|--|--|--|
| FAM133B                 | 2,34 |  |  |  |  |
| BCLAF1                  | 2,34 |  |  |  |  |
| POMP                    | 2,31 |  |  |  |  |
| MRPL57                  | 2,30 |  |  |  |  |
| MKMK2                   | 2,29 |  |  |  |  |
| TNFAIP3                 | 2,28 |  |  |  |  |
| PSMD8                   | 2,27 |  |  |  |  |
| CCT5                    | 2,22 |  |  |  |  |
| RSL24D1                 | 2,16 |  |  |  |  |
| PRDX1                   | 2,14 |  |  |  |  |
| PNN                     | 2,08 |  |  |  |  |
| ANXA1                   | 2,07 |  |  |  |  |
| gene:ENSSSCG00000000377 | 2,02 |  |  |  |  |
| ATP6                    | 1,88 |  |  |  |  |

Fold change of gene expression in infected cells comparing to control (mock-infected cells).
