# Supplementary material for: Porcine Circovirus Modulates Swine Influenza Virus Replication in Pig Tracheal Epithelial Cells and Porcine Alveolar Macrophages
Source: MDPI journal article supplement (doi:10.3390/v15051207), 2023-05-20
Supplement: s1 [file s1]

**Supplemental Table S5. Down-regulated genes in iPAM 3D4/21 cells**

| <b>PCV2b/H1N1</b>       |             | <b>PCV2b</b>            |             | <b>H1N1</b> |             |
|-------------------------|-------------|-------------------------|-------------|-------------|-------------|
| Gene ID                 | Fold change | Gene ID                 | Fold change | Gene ID     | Fold change |
| MGP                     | -28,88      | SENP5                   | -9,48       | MGP         | -39,64      |
| GSTA1                   | -6,75       | MGP                     | -6,54       | WNT16       | -4,73       |
| MAP2                    | -5,32       | EPS8                    | -5,77       | BMP7        | -4,46       |
| NECTIN1                 | -4,08       | TBC1D5                  | -5,49       | FAM110C     | -2,60       |
| SEMA3E                  | -3,94       | PCSK5                   | -5,47       | FIBIN       | -2,57       |
| PHACTR2                 | -3,63       | FLRT3                   | -5,30       | SCIN        | -2,51       |
| MARCKS                  | -3,25       | WDR11                   | -4,54       | IL1RL1      | -2,43       |
| SCIN                    | -3,03       | gene:ENSSSCG00000006725 | -4,50       | ZBTB20      | -2,32       |
| DMXL2                   | -2,95       | ATM                     | -4,25       | MARCKS      | -2,10       |
| gene:ENSSSCG00000023325 | -2,95       | SEMA3E                  | -4,24       | SELENOP     | -2,07       |
| BICC1                   | -2,91       | PLXDC2                  | -3,94       | COG3        | -2,04       |
| HOMER1                  | -2,69       | PBX3                    | -3,69       | TCEA3       | -1,98       |
| KRT14                   | -2,58       | USP13                   | -3,51       | GSTA1       | -1,94       |
| SELENOP                 | -2,58       | ARHGAP42                | -3,44       | PTPN13      | -1,92       |
| TCEA3                   | -2,56       | gene:ENSSSCG00000032297 | -3,41       | C1orf21     | -1,76       |
| LAMP1                   | -2,54       | EXOC6B                  | -3,34       |             |             |
| FARP1                   | -2,46       | PGAP1                   | -3,32       |             |             |
| WWC1                    | -2,43       | GSTA1                   | -3,28       |             |             |
| ARHGDIB                 | -2,29       | TUT4                    | -3,26       |             |             |
| ADAMTS1                 | -2,27       | PPP2R2B                 | -3,26       |             |             |
| PPP2R5A                 | -2,25       | ASXL2                   | -3,21       |             |             |
| PLS1                    | -2,25       | MGAT4C                  | -3,17       |             |             |
| SRPK2                   | -2,22       | MAP2                    | -3,15       |             |             |
| SMARCA2                 | -2,13       | AGL                     | -3,13       |             |             |
| PTPN13                  | -2,03       | FAM53B                  | -3,03       |             |             |
| MET                     | -2,01       | CERT1                   | -3,01       |             |             |
| TPP1                    | -2,00       | GTF2I                   | -2,98       |             |             |
|                         |             | PCLO                    | -2,91       |             |             |
|                         |             | FAM110C                 | -2,89       |             |             |
|                         |             | HOMER1                  | -2,89       |             |             |
|                         |             | BICC1                   | -2,86       |             |             |
|                         |             | DIP2B                   | -2,80       |             |             |
|                         |             | DMXL2                   | -2,76       |             |             |

|  |  |                         |       |  |  |
|--|--|-------------------------|-------|--|--|
|  |  | WWC1                    | -2,71 |  |  |
|  |  | PSME3IP1                | -2,69 |  |  |
|  |  | TCEA3                   | -2,69 |  |  |
|  |  | SMARCC2                 | -2,67 |  |  |
|  |  | NECTIN1                 | -2,67 |  |  |
|  |  | SLC16A7                 | -2,66 |  |  |
|  |  | PRKD3                   | -2,65 |  |  |
|  |  | URI1                    | -2,65 |  |  |
|  |  | DCDC2                   | -2,62 |  |  |
|  |  | KIAA1217                | -2,61 |  |  |
|  |  | PIBF1                   | -2,60 |  |  |
|  |  | NRDC                    | -2,59 |  |  |
|  |  | CASK                    | -2,58 |  |  |
|  |  | ARL13B                  | -2,57 |  |  |
|  |  | MGME1                   | -2,56 |  |  |
|  |  | PTPN13                  | -2,51 |  |  |
|  |  | PLS1                    | -2,51 |  |  |
|  |  | gene:ENSSSCG00000010401 | -2,50 |  |  |
|  |  | SLC37A4                 | -2,49 |  |  |
|  |  | IQGAP2                  | -2,49 |  |  |
|  |  | SREBF2                  | -2,46 |  |  |
|  |  | ACAP2                   | -2,46 |  |  |
|  |  | CNKSR2                  | -2,46 |  |  |
|  |  | SMARCA2                 | -2,45 |  |  |
|  |  | ZNF644                  | -2,43 |  |  |
|  |  | LAMP1                   | -2,43 |  |  |
|  |  | LAMC1                   | -2,42 |  |  |
|  |  | gene:ENSSSCG00000023325 | -2,36 |  |  |
|  |  | R3HDM2                  | -2,32 |  |  |
|  |  | ARID5B                  | -2,31 |  |  |
|  |  | SF3A3                   | -2,28 |  |  |
|  |  | CLCN5                   | -2,26 |  |  |
|  |  | MAL                     | -2,26 |  |  |
|  |  | MARCKS                  | -2,24 |  |  |
|  |  | PKD2                    | -2,24 |  |  |
|  |  | NDUFV1                  | -2,23 |  |  |
|  |  | MACC1                   | -2,22 |  |  |
|  |  | USP47                   | -2,21 |  |  |
|  |  | NR3C1                   | -2,19 |  |  |
|  |  | ASPM                    | -2,19 |  |  |
|  |  | gene:ENSSSCG00000009501 | -2,17 |  |  |

|  |  |                         |       |  |  |
|--|--|-------------------------|-------|--|--|
|  |  | FARP1                   | -2,16 |  |  |
|  |  | PALMD                   | -2,16 |  |  |
|  |  | EML4                    | -2,15 |  |  |
|  |  | ZMYND11                 | -2,13 |  |  |
|  |  | ENPP4                   | -2,11 |  |  |
|  |  | PTPRZ1                  | -2,11 |  |  |
|  |  | GNS                     | -2,10 |  |  |
|  |  | ACSL3                   | -2,08 |  |  |
|  |  | MET                     | -2,08 |  |  |
|  |  | ARHGEF12                | -2,07 |  |  |
|  |  | SELENOP                 | -2,07 |  |  |
|  |  | APIB1                   | -2,07 |  |  |
|  |  | SORT1                   | -2,06 |  |  |
|  |  | SORBS1                  | -2,06 |  |  |
|  |  | IGF2BP3                 | -2,05 |  |  |
|  |  | GLG1                    | -2,05 |  |  |
|  |  | PPP1R21                 | -2,05 |  |  |
|  |  | NPNT                    | -2,05 |  |  |
|  |  | UBR5                    | -2,01 |  |  |
|  |  | GOLIM4                  | -2,00 |  |  |
|  |  | AIFM1                   | -1,99 |  |  |
|  |  | ADD3                    | -1,99 |  |  |
|  |  | AP3D1                   | -1,98 |  |  |
|  |  | TEAD1                   | -1,97 |  |  |
|  |  | gene:ENSSSCG00000017783 | -1,97 |  |  |
|  |  | PPP2R5A                 | -1,96 |  |  |
|  |  | LAMB1                   | -1,96 |  |  |
|  |  | TTC3                    | -1,95 |  |  |
|  |  | APLP2                   | -1,94 |  |  |
|  |  | ITCH                    | -1,93 |  |  |
|  |  | NECTIN3                 | -1,93 |  |  |
|  |  | CRIM1                   | -1,92 |  |  |
|  |  | DDX46                   | -1,92 |  |  |
|  |  | ECPAS                   | -1,88 |  |  |
|  |  | CXADR                   | -1,88 |  |  |
|  |  | RB1CC1                  | -1,86 |  |  |
|  |  | ATP11C                  | -1,86 |  |  |
|  |  | FOXN3                   | -1,84 |  |  |
|  |  | ATP6V1C1                | -1,84 |  |  |
|  |  | SLC39A10                | -1,82 |  |  |
|  |  | gene:ENSSSCG00000002722 | -1,82 |  |  |

|  |  |                         |       |  |  |
|--|--|-------------------------|-------|--|--|
|  |  | IRF2BP2                 | -1,82 |  |  |
|  |  | SYNE2                   | -1,81 |  |  |
|  |  | SPTBN1                  | -1,80 |  |  |
|  |  | KRT14                   | -1,80 |  |  |
|  |  | HNRNPR                  | -1,80 |  |  |
|  |  | IARS1                   | -1,79 |  |  |
|  |  | gene:ENSSSCG00000012102 | -1,77 |  |  |
|  |  | EHHADH                  | -1,77 |  |  |
|  |  | RSRC1                   | -1,75 |  |  |
|  |  | ATRX                    | -1,71 |  |  |
|  |  | NASP                    | -1,69 |  |  |
|  |  | MYO6                    | -1,67 |  |  |
|  |  | PSMD2                   | -1,66 |  |  |
|  |  | PTGFRN                  | -1,66 |  |  |
|  |  | CALD1                   | -1,66 |  |  |
|  |  | SMARCC1                 | -1,65 |  |  |
|  |  | TOP2B                   | -1,62 |  |  |

Fold change of gene expression in infected cells comparing to control (mock-infected cells).
