# Supplementary material for: Porcine Circovirus Modulates Swine Influenza Virus Replication in Pig Tracheal Epithelial Cells and Porcine Alveolar Macrophages
Source: MDPI journal article supplement (doi:10.3390/v15051207), 2023-05-20
Supplement: s1 [file s1]

**Supplemental Table S4. Up-regulated genes in iPAM 3D4/21 cells**

| <b>PCV2b/H1N1</b>       |             | <b>PCV2b</b>            |             | <b>H1N1</b>             |             |
|-------------------------|-------------|-------------------------|-------------|-------------------------|-------------|
| Gene ID                 | Fold change | Gene ID                 | Fold change | Gene ID                 | Fold change |
| FAM124A                 | 246,10      | RCSD1                   | 217,99      | CCK                     | 181,02      |
| MX2                     | 235,55      | FAM124A                 | 200,88      | IL19                    | 98,10       |
| ARG1                    | 200,86      | ARG1                    | 195,20      | RCSD1                   | 21,56       |
| VAT1L                   | 182,81      | VAT1L                   | 165,05      | gene:ENSSSCG00000043470 | 18,83       |
| CCK                     | 174,13      | SLC38A4                 | 134,88      | C3                      | 13,90       |
| SLC38A4                 | 146,43      | CCK                     | 122,35      | TNFAIP3                 | 9,59        |
| RCSD1                   | 113,02      | MX2                     | 110,08      | S100A8                  | 9,49        |
| IL19                    | 70,79       | IL19                    | 71,13       | TNIP3                   | 8,60        |
| CXCL2                   | 35,69       | CHRNA                   | 40,13       | CXCL2                   | 8,24        |
| ISG15                   | 35,34       | ISG15                   | 28,95       | NLRP3                   | 8,08        |
| gene:ENSSSCG00000045989 | 32,50       | B3GNT9                  | 26,12       | PLET1                   | 6,10        |
| B3GNT9                  | 28,46       | gene:ENSSSCG00000049288 | 23,38       | PTGS2                   | 5,96        |
| CHRNA                   | 27,13       | CXCL2                   | 22,51       | HS3ST1                  | 5,44        |
| gene:ENSSSCG00000022738 | 20,66       | gene:ENSSSCG00000022738 | 19,10       | CD14                    | 4,74        |
| ISG12(A)                | 19,86       | ISG12(A)                | 18,00       | EHF                     | 4,25        |
| gene:ENSSSCG00000032591 | 17,87       | CABP5                   | 17,38       | ZC3H12A                 | 4,17        |
| TNFAIP3                 | 17,26       | PRDM5                   | 14,94       | gene:ENSSSCG0000006588  | 4,14        |
| PTGS2                   | 17,23       | S100A8                  | 13,64       | ANKRD1                  | 4,12        |
| TNIP3                   | 15,35       | gene:ENSSSCG00000046436 | 13,33       | IL1A                    | 4,05        |
| IQUB                    | 14,65       | IQUB                    | 13,08       | STYXL1                  | 4,04        |
| IFIT1                   | 14,51       | PTGS2                   | 11,41       | ZC3H12C                 | 3,99        |
| CABP5                   | 13,45       | DHRS9                   | 10,49       | ING3                    | 3,66        |
| S100A8                  | 12,59       | CCL2                    | 10,48       | S100A12                 | 3,55        |
| gene:ENSSSCG00000049288 | 12,25       | NLRP3                   | 10,09       | gene:ENSSSCG00000014997 | 3,54        |
| gene:ENSSSCG00000016733 | 12,14       | TGFBR3                  | 9,79        | CHI3L1                  | 3,29        |
| KLF4                    | 11,67       | TNFAIP3                 | 9,74        | ITPR1                   | 3,24        |
| NLRP3                   | 9,74        | ZC3H12A                 | 9,55        | ICAM1                   | 3,14        |
| TGFBR3                  | 9,13        | gene:ENSSSCG00000032591 | 9,51        | PIGR                    | 3,12        |
| PRDM5                   | 8,96        | IFIT1                   | 8,46        | F3                      | 2,97        |
| MX1                     | 8,90        | PAPPA                   | 7,87        | FBXO32                  | 2,94        |
| DHRS9                   | 8,67        | gene:ENSSSCG00000047320 | 7,79        | RNF125                  | 2,78        |
| CHAC1                   | 8,61        | AGR2                    | 7,74        | APIP                    | 2,75        |
| PLET1                   | 8,60        | gene:ENSSSCG00000049253 | 7,63        | MX1                     | 2,73        |
| gene:ENSSSCG00000043470 | 7,98        | TNIP3                   | 7,47        | gene:ENSSSCG00000020872 | 2,70        |
| IL1A                    | 7,94        | CDC6                    | 7,34        | HPS5                    | 2,52        |

|                          |      |                          |      |                         |      |
|--------------------------|------|--------------------------|------|-------------------------|------|
| gene:ENSSSCG00000010878  | 7,52 | C3                       | 7,25 | TNIP1                   | 2,46 |
| ATP5MC3                  | 7,25 | gene:ENSSSCG00000010878  | 7,11 | IER3                    | 2,43 |
| C3                       | 7,21 | EDN1                     | 6,92 | CD44                    | 2,41 |
| PMAIP1                   | 7,16 | MX1                      | 6,30 | NFKBIZ                  | 2,37 |
| ATG101                   | 7,02 | PSPH                     | 6,23 | PLTP                    | 2,34 |
| gene:ENSSSCG00000008929  | 6,79 | MMP13                    | 6,23 | TXNRD1                  | 2,32 |
| NUPR1                    | 6,42 | gene:ENSSSCG00000017864  | 6,07 | ATF3                    | 2,25 |
| EDN1                     | 6,10 | gene:ENSSSCG00000044847  | 6,07 | CFTR                    | 2,18 |
| CDC6                     | 6,09 | PLET1                    | 5,92 | gene:ENSSSCG00000010954 | 2,03 |
| gene:ENSSSCG00000047320  | 6,08 | TPST1                    | 5,69 | COX1                    | 1,99 |
| SERPINE1                 | 6,05 | gene:ENSSSCG000000038304 | 5,55 | TNFRSF1B                | 1,90 |
| gene:ENSSSCG000000024973 | 5,82 | ND6                      | 5,50 | EREG                    | 1,89 |
| TRIB3                    | 5,66 | HOOK2                    | 5,45 | GSAP                    | 1,84 |
| TPST1                    | 5,63 | ATG101                   | 5,36 | PADI1                   | 1,84 |
| ANKRD1                   | 5,33 | GLP2R                    | 5,22 |                         |      |
| OLFML3                   | 5,28 | gene:ENSSSCG000000024973 | 5,19 |                         |      |
| RASSF1                   | 5,20 | SOX9                     | 5,16 |                         |      |
| HS3ST1                   | 5,13 | MLLT11                   | 5,11 |                         |      |
| IVL                      | 5,12 | gene:ENSSSCG000000026210 | 5,11 |                         |      |
| gene:ENSSSCG00000014997  | 5,06 | S100A12                  | 4,91 |                         |      |
| IFIT2                    | 5,01 | PMAIP1                   | 4,90 |                         |      |
| gene:ENSSSCG00000044847  | 5,01 | RASSF1                   | 4,75 |                         |      |
| SOX9                     | 4,80 | SERPINE1                 | 4,62 |                         |      |
| MAP3K8                   | 4,79 | MXD1                     | 4,57 |                         |      |
| gene:ENSSSCG00000006588  | 4,73 | IVL                      | 4,57 |                         |      |
| CHI3L1                   | 4,50 | TDG                      | 4,57 |                         |      |
| SLC1A4                   | 4,49 | RNF19B                   | 4,52 |                         |      |
| ZC3H12C                  | 4,39 | ANKRD1                   | 4,50 |                         |      |
| FOS                      | 4,37 | NFKBIA                   | 4,42 |                         |      |
| IL6                      | 4,37 | RGS2                     | 4,33 |                         |      |
| PPP1R15A                 | 4,33 | IER3                     | 4,24 |                         |      |
| MMP13                    | 4,27 | MAP3K8                   | 4,21 |                         |      |
| IFIH1                    | 4,18 | GMNN                     | 4,18 |                         |      |
| gene:ENSSSCG00000012050  | 4,16 | CSKMT                    | 4,09 |                         |      |
| IER3                     | 4,09 | gene:ENSSSCG00000012050  | 4,07 |                         |      |
| EPSTI1                   | 4,06 | GADD45B                  | 3,95 |                         |      |
| LIPG                     | 4,03 | IL1A                     | 3,94 |                         |      |
| IFNGR1                   | 4,01 | AGPAT4                   | 3,93 |                         |      |
| EHF                      | 3,99 | SEMA7A                   | 3,93 |                         |      |
| ITPR1                    | 3,98 | gene:ENSSSCG00000006588  | 3,89 |                         |      |
| HERC5                    | 3,98 | CCDC80                   | 3,83 |                         |      |

|                          |      |                          |      |  |  |
|--------------------------|------|--------------------------|------|--|--|
| GADD45B                  | 3,95 | ZNFX1                    | 3,77 |  |  |
| ING3                     | 3,93 | SERTAD1                  | 3,70 |  |  |
| F3                       | 3,91 | CHI3L1                   | 3,70 |  |  |
| PLAU                     | 3,88 | NFKBIZ                   | 3,69 |  |  |
| CCN2                     | 3,86 | CCN2                     | 3,67 |  |  |
| NFKBIA                   | 3,80 | HBEGF                    | 3,65 |  |  |
| GADD45A                  | 3,74 | RND3                     | 3,65 |  |  |
| ZC3H12A                  | 3,68 | IFFO2                    | 3,63 |  |  |
| ATF3                     | 3,68 | gene:ENSSSCG000000047164 | 3,59 |  |  |
| S100A12                  | 3,65 | TMPRSS11F                | 3,47 |  |  |
| PSPH                     | 3,62 | THOC6                    | 3,45 |  |  |
| gene:ENSSSCG000000013613 | 3,61 | ZC3H12C                  | 3,44 |  |  |
| NRP2                     | 3,50 | ICAM1                    | 3,37 |  |  |
| EGR1                     | 3,40 | MAFG                     | 3,35 |  |  |
| TTC9                     | 3,32 | SAT1                     | 3,29 |  |  |
| FBXO32                   | 3,29 | ADM                      | 3,24 |  |  |
| OAS2                     | 3,27 | ZNF131                   | 3,24 |  |  |
| BATF3                    | 3,23 | F3                       | 3,22 |  |  |
| gene:ENSSSCG000000009633 | 3,22 | IFNGR1                   | 3,18 |  |  |
| VEGFA                    | 3,21 | COX1                     | 3,16 |  |  |
| RND3                     | 3,19 | HS3ST1                   | 3,15 |  |  |
| ICAM1                    | 3,14 | gene:ENSSSCG000000017106 | 3,13 |  |  |
| CSKMT                    | 3,10 | HPS5                     | 3,11 |  |  |
| JMY                      | 3,08 | S1PR1                    | 3,08 |  |  |
| EREG                     | 3,06 | CUTC                     | 3,08 |  |  |
| TMPRSS11F                | 3,02 | gene:ENSSSCG000000014997 | 3,04 |  |  |
| HBEGF                    | 2,99 | HERC5                    | 3,02 |  |  |
| CTSC                     | 2,97 | APOBEC1                  | 2,89 |  |  |
| SGMS2                    | 2,92 | RSRP1                    | 2,88 |  |  |
| NMI                      | 2,89 | gene:ENSSSCG000000009633 | 2,86 |  |  |
| APOBEC1                  | 2,87 | gene:ENSSSCG000000033189 | 2,83 |  |  |
| PLK2                     | 2,86 | FJX1                     | 2,81 |  |  |
| TMEM87B                  | 2,85 | EPSTI1                   | 2,80 |  |  |
| CENPS                    | 2,82 | MMP7                     | 2,80 |  |  |
| CD44                     | 2,81 | NUPR1                    | 2,76 |  |  |
| CSTF2                    | 2,80 | CCNL1                    | 2,76 |  |  |
| H1-3                     | 2,80 | DDX52                    | 2,73 |  |  |
| gene:ENSSSCG000000003079 | 2,73 | EREG                     | 2,73 |  |  |
| NFKBIZ                   | 2,69 | LIPG                     | 2,62 |  |  |
| COX1                     | 2,69 | TRIB1                    | 2,61 |  |  |
| MKNK2                    | 2,67 | BRIX1                    | 2,61 |  |  |

|                         |      |                         |      |  |  |
|-------------------------|------|-------------------------|------|--|--|
| MED13                   | 2,56 | C1orf52                 | 2,58 |  |  |
| TNIP1                   | 2,54 | MALT1                   | 2,58 |  |  |
| ZNFX1                   | 2,53 | SIRT7                   | 2,57 |  |  |
| TARS1                   | 2,50 | GADD45A                 | 2,56 |  |  |
| HPS5                    | 2,49 | OAS2                    | 2,55 |  |  |
| CDCP1                   | 2,35 | EHF                     | 2,55 |  |  |
| YPEL2                   | 2,33 | RBP4                    | 2,53 |  |  |
| gene:ENSSSCG00000032525 | 2,30 | FST                     | 2,51 |  |  |
| SAT1                    | 2,21 | FAM76B                  | 2,48 |  |  |
| BRIX1                   | 2,20 | CBX2                    | 2,44 |  |  |
| SAMD9                   | 2,19 | SECISBP2L               | 2,41 |  |  |
| SERPINE2                | 2,16 | AMOTL2                  | 2,41 |  |  |
| JAG1                    | 2,16 | PLK2                    | 2,41 |  |  |
| ATF4                    | 2,05 | GID4                    | 2,40 |  |  |
| EIF2AK2                 | 2,04 | IFITM3                  | 2,39 |  |  |
| PSME2                   | 2,02 | TP53RK                  | 2,39 |  |  |
| EIF4EBP1                | 1,96 | TNFSF9                  | 2,38 |  |  |
| EIF3J                   | 1,94 | gene:ENSSSCG00000016441 | 2,38 |  |  |
| ACSL4                   | 1,85 | CTSC                    | 2,37 |  |  |
| PADI1                   | 1,83 | TMEM87B                 | 2,37 |  |  |
|                         |      | WDR74                   | 2,32 |  |  |
|                         |      | CFD                     | 2,31 |  |  |
|                         |      | TNIP1                   | 2,31 |  |  |
|                         |      | JAG1                    | 2,31 |  |  |
|                         |      | CSTF2                   | 2,29 |  |  |
|                         |      | FKBP4                   | 2,27 |  |  |
|                         |      | ATF3                    | 2,25 |  |  |
|                         |      | KLF6                    | 2,23 |  |  |
|                         |      | R3HDM4                  | 2,20 |  |  |
|                         |      | gene:ENSSSCG00000003079 | 2,19 |  |  |
|                         |      | MGLL                    | 2,17 |  |  |
|                         |      | AMD1                    | 2,15 |  |  |
|                         |      | MAP2K3                  | 2,11 |  |  |
|                         |      | gene:ENSSSCG00000017754 | 2,08 |  |  |
|                         |      | BST2                    | 2,07 |  |  |
|                         |      | BMP4                    | 2,07 |  |  |
|                         |      | FBXO32                  | 2,06 |  |  |
|                         |      | FAM177A1                | 2,06 |  |  |
|                         |      | gene:ENSSSCG00000011803 | 2,05 |  |  |
|                         |      | CCND1                   | 2,04 |  |  |
|                         |      | CD44                    | 2,03 |  |  |

|  |  |                         |      |  |  |
|--|--|-------------------------|------|--|--|
|  |  | ZFP36L1                 | 2,01 |  |  |
|  |  | gene:ENSSSCG00000028092 | 2,00 |  |  |
|  |  | IVNS1ABP                | 1,97 |  |  |
|  |  | ID2                     | 1,96 |  |  |
|  |  | CLDN1                   | 1,95 |  |  |
|  |  | TRIM25                  | 1,93 |  |  |
|  |  | NAMPT                   | 1,92 |  |  |
|  |  | PLEKHN1                 | 1,92 |  |  |
|  |  | MKNK2                   | 1,91 |  |  |
|  |  | TAF1D                   | 1,89 |  |  |
|  |  | EMP1                    | 1,89 |  |  |
|  |  | TRA2B                   | 1,88 |  |  |
|  |  | FSCN1                   | 1,87 |  |  |
|  |  | DNAJB1                  | 1,86 |  |  |
|  |  | SAMD9                   | 1,84 |  |  |
|  |  | SNAPC1                  | 1,84 |  |  |
|  |  | SERPINE2                | 1,82 |  |  |
|  |  | EIF3J                   | 1,82 |  |  |
|  |  | TM4SF1                  | 1,79 |  |  |
|  |  | SPP1                    | 1,77 |  |  |
|  |  | POLR3D                  | 1,77 |  |  |
|  |  | SDC1                    | 1,73 |  |  |
|  |  | RSRC2                   | 1,68 |  |  |
|  |  | MAP7D1                  | 1,68 |  |  |
|  |  | SRXN1                   | 1,63 |  |  |
|  |  | LLPH                    | 1,59 |  |  |

Fold change of gene expression in infected cells comparing to control (mock-infected cells).
