# Supplementary material for: Porcine Circovirus Modulates Swine Influenza Virus Replication in Pig Tracheal Epithelial Cells and Porcine Alveolar Macrophages
Source: MDPI journal article supplement (doi:10.3390/v15051207), 2023-05-20
Supplement: s1 [file s1]

**Supplemental Table S3. Down-regulated genes in NPTr cells**

| <b>PCV2b/H1N1</b>       |             | <b>PCV2b</b>            |             | <b>H1N1</b>             |             |
|-------------------------|-------------|-------------------------|-------------|-------------------------|-------------|
| Gene ID                 | Fold change | Gene ID                 | Fold change | Gene ID                 | Fold change |
| DIAPH2                  | -18,95      | YPEL2                   | -21,80      | gene:ENSSSCG00000043033 | -8,37       |
| SWI5                    | -18,26      | PAPSS1                  | -18,98      | CCDC47                  | -4,61       |
| CHD6                    | -14,14      | gene:ENSSSCG00000015491 | -16,28      | ING3                    | -4,11       |
| FAM114A1                | -13,86      | ZBTB37                  | -14,77      | UBAP2L                  | -4,06       |
| PPP1R9A                 | -13,08      | SMARCA2                 | -13,94      | gene:ENSSSCG00000002722 | -3,06       |
| YPEL2                   | -12,59      | SFT2D2                  | -13,77      | gene:ENSSSCG00000015337 | -2,90       |
| gene:ENSSSCG00000035037 | -12,35      | NXN                     | -12,01      | EMILIN2                 | -2,86       |
| RCAN2                   | -12,06      | SLC5A3                  | -11,40      | MICU2                   | -2,84       |
| SLC5A3                  | -11,95      | SYPL1                   | -9,79       | PSMC3                   | -2,74       |
| PRKCI                   | -11,72      | PTPRG                   | -9,59       | RBM25                   | -2,74       |
| SGSM1                   | -11,45      | NET1                    | -9,39       | LAMC1                   | -2,68       |
| NBAS                    | -11,43      | OS9                     | -9,14       | LAP3                    | -2,43       |
| GUSB                    | -10,96      | SYNE2                   | -8,88       | HK1                     | -2,29       |
| SCEL                    | -10,85      | MED4                    | -8,73       | gene:ENSSSCG00000035209 | -2,27       |
| PPP2R5A                 | -10,69      | CADM1                   | -8,66       | HSPD1                   | -2,26       |
| LAMP2                   | -10,56      | EMB                     | -8,48       | EEA1                    | -2,25       |
| VPS13C                  | -10,30      | HLTF                    | -8,32       | gene:ENSSSCG00000042436 | -2,20       |
| KANK2                   | -9,75       | gene:ENSSSCG00000035037 | -8,24       | gene:ENSSSCG00000022176 | -2,19       |
| MTURN                   | -9,54       | CMTM4                   | -8,20       | CCN3                    | -2,07       |
| TNIK                    | -9,40       | ATP11C                  | -8,09       | gene:ENSSSCG00000043470 | -2,07       |
| UACA                    | -9,32       | RCAN2                   | -7,97       | FBNP1L                  | -2,01       |
| LIMCH1                  | -9,26       | ITGB4                   | -7,92       | gene:ENSSSCG00000036350 | -2,01       |
| CADM1                   | -9,22       | SEC31A                  | -7,92       | SMARCC1                 | -1,90       |
| R3HDM2                  | -9,15       | MYO6                    | -7,43       | PTGES                   | -1,85       |
| NXN                     | -8,66       | SIL1                    | -7,43       | ITGA2                   | -1,71       |
| FBNP1L                  | -8,66       | DLG1                    | -7,20       | HSP90AB1                | -1,68       |
| PDK3                    | -8,53       | FARP1                   | -7,09       | SYVN1                   | -1,66       |
| ATP11C                  | -8,52       | SMPDL3B                 | -7,05       |                         |             |
| SGMS2                   | -8,41       | FAM114A1                | -7,02       |                         |             |
| CGNL1                   | -8,39       | FAM162A                 | -6,96       |                         |             |
| SEC31A                  | -8,31       | gene:ENSSSCG00000040337 | -6,91       |                         |             |
| GOLM1                   | -8,17       | ATRX                    | -6,87       |                         |             |
| GPC1                    | -8,13       | ARHGAP5                 | -6,69       |                         |             |
| gene:ENSSSCG00000004511 | -7,96       | DPCD                    | -6,68       |                         |             |
| NF1                     | -7,79       | PMEPA1                  | -6,59       |                         |             |

|                         |       |                         |       |  |  |
|-------------------------|-------|-------------------------|-------|--|--|
| SIL1                    | -7,79 | TCEA3                   | -6,59 |  |  |
| USO1                    | -7,72 | ASH1L                   | -6,58 |  |  |
| OXR1                    | -7,67 | UBXN1                   | -6,35 |  |  |
| FCHSD2                  | -7,66 | STRBP                   | -6,35 |  |  |
| SACM1L                  | -7,66 | SGSM1                   | -6,18 |  |  |
| SMG1                    | -7,63 | USO1                    | -6,17 |  |  |
| COPB1                   | -7,60 | PTPRF                   | -6,16 |  |  |
| ATRX                    | -7,57 | TSPO                    | -6,07 |  |  |
| SGPP2                   | -7,57 | MTSS1                   | -6,06 |  |  |
| PPP1R21                 | -7,54 | IQGAP2                  | -6,05 |  |  |
| gene:ENSSSCG00000012074 | -7,54 | PRKCI                   | -5,96 |  |  |
| GPBP1                   | -7,37 | MYOF                    | -5,91 |  |  |
| gene:ENSSSCG00000026996 | -7,34 | BIRC6                   | -5,87 |  |  |
| PPME1                   | -7,32 | MRPL37                  | -5,83 |  |  |
| SYNE2                   | -7,32 | NBAS                    | -5,81 |  |  |
| SLC39A10                | -7,24 | ARHGAP18                | -5,81 |  |  |
| EXOC1                   | -7,17 | C3                      | -5,81 |  |  |
| SLC44A2                 | -7,13 | CEP290                  | -5,79 |  |  |
| DPP4                    | -7,09 | VPS13C                  | -5,79 |  |  |
| DCTN2                   | -7,00 | gene:ENSSSCG00000004387 | -5,68 |  |  |
| BBX                     | -6,97 | PDK3                    | -5,67 |  |  |
| PATJ                    | -6,94 | CLSTN1                  | -5,66 |  |  |
| SPTBN1                  | -6,89 | UTRN                    | -5,61 |  |  |
| gene:ENSSSCG00000009501 | -6,82 | ARFIP1                  | -5,52 |  |  |
| COL5A1                  | -6,82 | PPP1R21                 | -5,51 |  |  |
| TNRC6B                  | -6,80 | XPO1                    | -5,48 |  |  |
| CLCN5                   | -6,74 | gene:ENSSSCG00000040990 | -5,47 |  |  |
| EIF2AK2                 | -6,74 | CYP20A1                 | -5,42 |  |  |
| APPL1                   | -6,71 | gene:ENSSSCG00000022032 | -5,39 |  |  |
| PCMTD1                  | -6,70 | CPNE3                   | -5,30 |  |  |
| PALLD                   | -6,70 | KIF20B                  | -5,25 |  |  |
| STRBP                   | -6,68 | TMEM30A                 | -5,25 |  |  |
| DTNA                    | -6,66 | ASPH                    | -5,02 |  |  |
| ATP2B4                  | -6,65 | NPNT                    | -4,89 |  |  |
| ACBD3                   | -6,63 | DSP                     | -4,86 |  |  |
| MICU2                   | -6,58 | KANK2                   | -4,85 |  |  |
| CUEDC1                  | -6,58 | AGRN                    | -4,83 |  |  |
| ATXN10                  | -6,57 | IGFBP7                  | -4,81 |  |  |
| MIPEP                   | -6,54 | LIMCH1                  | -4,71 |  |  |
| gene:ENSSSCG00000015491 | -6,54 | NDUFS4                  | -4,63 |  |  |
| ROCK2                   | -6,44 | gene:ENSSSCG00000017509 | -4,61 |  |  |

|                         |       |                         |       |  |  |
|-------------------------|-------|-------------------------|-------|--|--|
| TGFB1                   | -6,44 | USP8                    | -4,58 |  |  |
| KCNK12                  | -6,15 | TM9SF4                  | -4,55 |  |  |
| ROBO1                   | -6,15 | TRMT10A                 | -4,55 |  |  |
| BICC1                   | -6,14 | MEST                    | -4,52 |  |  |
| ILRUN                   | -6,14 | SCEL                    | -4,46 |  |  |
| NAB1                    | -6,10 | gene:ENSSSCG00000012074 | -4,46 |  |  |
| ACBD6                   | -6,09 | FNDC3A                  | -4,44 |  |  |
| NRDC                    | -6,09 | COX7A2L                 | -4,41 |  |  |
| ZNF292                  | -6,09 | ACAP2                   | -4,35 |  |  |
| TMEM52                  | -6,06 | gene:ENSSSCG00000026996 | -4,35 |  |  |
| RHOA                    | -5,99 | USP14                   | -4,34 |  |  |
| EGFR                    | -5,94 | CXCL14                  | -4,27 |  |  |
| DIAPH3                  | -5,94 | F3                      | -4,18 |  |  |
| C1orf21                 | -5,92 | gene:ENSSSCG00000049831 | -4,15 |  |  |
| ARFIP1                  | -5,79 | PRRG1                   | -4,12 |  |  |
| ASPM                    | -5,76 | CALD1                   | -4,05 |  |  |
| IQGAP2                  | -5,75 | ITGAV                   | -4,03 |  |  |
| DYNC2H1                 | -5,73 | ECHS1                   | -4,03 |  |  |
| SORT1                   | -5,71 | ERC1                    | -3,99 |  |  |
| ASH1L                   | -5,67 | THRAP3                  | -3,98 |  |  |
| CFDP1                   | -5,65 | LAMP2                   | -3,98 |  |  |
| gene:ENSSSCG00000020686 | -5,63 | ZNF292                  | -3,95 |  |  |
| JAK1                    | -5,61 | ARHGEF12                | -3,95 |  |  |
| LOXL2                   | -5,55 | VIRMA                   | -3,94 |  |  |
| CPSF3                   | -5,55 | BBX                     | -3,93 |  |  |
| SFT2D2                  | -5,53 | TPM1                    | -3,93 |  |  |
| RAI14                   | -5,53 | TEAD1                   | -3,92 |  |  |
| KIF20B                  | -5,52 | LARS1                   | -3,90 |  |  |
| UBR4                    | -5,52 | SEMA3C                  | -3,88 |  |  |
| MYO6                    | -5,44 | CNOT1                   | -3,85 |  |  |
| CCN3                    | -5,42 | gene:ENSSSCG00000040056 | -3,76 |  |  |
| LARS1                   | -5,41 | DCBLD2                  | -3,75 |  |  |
| ARCN1                   | -5,38 | SGPP2                   | -3,71 |  |  |
| KRT18                   | -5,34 | TM9SF2                  | -3,71 |  |  |
| CALD1                   | -5,34 | CDH6                    | -3,66 |  |  |
| HLA-DRA                 | -5,33 | UBXN4                   | -3,65 |  |  |
| gene:ENSSSCG00000020872 | -5,32 | PDK1                    | -3,65 |  |  |
| UTRN                    | -5,13 | ROCK2                   | -3,64 |  |  |
| IFT57                   | -5,13 | GOLM1                   | -3,60 |  |  |
| XPO7                    | -5,11 | CPSF3                   | -3,57 |  |  |
| PAWR                    | -5,08 | ROBO1                   | -3,57 |  |  |

|                          |       |                         |       |  |  |
|--------------------------|-------|-------------------------|-------|--|--|
| ITPR2                    | -5,03 | IDH2                    | -3,54 |  |  |
| HK1                      | -4,95 | MAP1B                   | -3,54 |  |  |
| C3                       | -4,94 | ARFGAP3                 | -3,52 |  |  |
| RSRC1                    | -4,89 | ADGRG1                  | -3,52 |  |  |
| NDUFS4                   | -4,86 | AP2B1                   | -3,50 |  |  |
| DNMT1                    | -4,85 | IGF2BP2                 | -3,49 |  |  |
| CNOT1                    | -4,81 | VGLL4                   | -3,49 |  |  |
| ERBIN                    | -4,81 | ACBD3                   | -3,49 |  |  |
| LAMB3                    | -4,79 | MFF                     | -3,48 |  |  |
| gene:ENSSSCG00000042436  | -4,71 | P4HA1                   | -3,46 |  |  |
| BIRC6                    | -4,70 | LAMB3                   | -3,44 |  |  |
| gene:ENSSSCG00000001455  | -4,66 | STAG2                   | -3,44 |  |  |
| SMARCA2                  | -4,66 | GM2A                    | -3,43 |  |  |
| KTN1                     | -4,65 | FN1                     | -3,41 |  |  |
| NAGA                     | -4,61 | SH3GLB1                 | -3,39 |  |  |
| CALCOCO2                 | -4,58 | LOXL2                   | -3,38 |  |  |
| gene:ENSSSCG000000015011 | -4,57 | CCNI                    | -3,38 |  |  |
| USP14                    | -4,56 | CTNNA1                  | -3,37 |  |  |
| NES                      | -4,56 | VPS36                   | -3,36 |  |  |
| ZMYND11                  | -4,55 | DIAPH2                  | -3,34 |  |  |
| MYOF                     | -4,53 | DYNC1LI2                | -3,33 |  |  |
| NUCB1                    | -4,52 | COL5A1                  | -3,32 |  |  |
| DCDC2                    | -4,49 | PCM1                    | -3,31 |  |  |
| PPFIBP1                  | -4,49 | CAMK2D                  | -3,30 |  |  |
| gene:ENSSSCG00000007322  | -4,49 | JAK1                    | -3,29 |  |  |
| CCDC80                   | -4,45 | MTURN                   | -3,29 |  |  |
| IQGAP1                   | -4,44 | gene:ENSSSCG00000034871 | -3,27 |  |  |
| PRPF6                    | -4,44 | gene:ENSSSCG00000028092 | -3,25 |  |  |
| ARL13B                   | -4,39 | SLC22A18                | -3,25 |  |  |
| SEMA3C                   | -4,39 | TPP1                    | -3,23 |  |  |
| LAMC1                    | -4,37 | RAB10                   | -3,22 |  |  |
| AP3B1                    | -4,34 | SKIL                    | -3,21 |  |  |
| PDS5B                    | -4,33 | DTNA                    | -3,21 |  |  |
| PM20D2                   | -4,31 | PPME1                   | -3,21 |  |  |
| PTPRG                    | -4,31 | EGFR                    | -3,21 |  |  |
| FAM13A                   | -4,31 | LAD1                    | -3,20 |  |  |
| CLTC                     | -4,27 | CETN3                   | -3,18 |  |  |
| PLOD1                    | -4,26 | SORT1                   | -3,17 |  |  |
| IDH2                     | -4,24 | SUPT3H                  | -3,16 |  |  |
| KRT8                     | -4,23 | LAMC2                   | -3,14 |  |  |
| ARFGAP3                  | -4,22 | LRPAP1                  | -3,14 |  |  |

|                          |       |                          |       |  |  |
|--------------------------|-------|--------------------------|-------|--|--|
| PKD1                     | -4,19 | ENO1                     | -3,11 |  |  |
| ERC1                     | -4,19 | CD2AP                    | -3,11 |  |  |
| PFKP                     | -4,19 | TUBB2B                   | -3,10 |  |  |
| gene:ENSSSCG00000003047  | -4,19 | KRT14                    | -3,09 |  |  |
| WDR1                     | -4,16 | NF1                      | -3,08 |  |  |
| AGRN                     | -4,16 | IQGAP1                   | -3,07 |  |  |
| FBXO2                    | -4,15 | CD44                     | -3,07 |  |  |
| ARHGEF12                 | -4,15 | BICC1                    | -3,07 |  |  |
| STAG2                    | -4,13 | SYT11                    | -3,05 |  |  |
| RALA                     | -4,10 | ATP6V1C1                 | -3,03 |  |  |
| EIF2A                    | -4,08 | RAB6A                    | -3,03 |  |  |
| WASF2                    | -4,06 | FAM13A                   | -3,01 |  |  |
| STRN                     | -4,05 | CCDC88A                  | -3,01 |  |  |
| CD2AP                    | -4,04 | BAZ1B                    | -3,01 |  |  |
| ASCC3                    | -4,03 | BNIP3L                   | -3,00 |  |  |
| NSMCE1                   | -4,02 | COPB1                    | -2,99 |  |  |
| TPM1                     | -4,00 | gene:ENSSSCG000000009501 | -2,99 |  |  |
| ACAP2                    | -3,95 | DHX29                    | -2,98 |  |  |
| RIF1                     | -3,94 | ATP2B4                   | -2,97 |  |  |
| gene:ENSSSCG000000006156 | -3,94 | APLP2                    | -2,95 |  |  |
| HLTF                     | -3,92 | DEPDC1B                  | -2,94 |  |  |
| DLG1                     | -3,89 | RBM26                    | -2,94 |  |  |
| DDB1                     | -3,86 | ATP1A1                   | -2,94 |  |  |
| SMPDL3B                  | -3,86 | CALCOCO2                 | -2,93 |  |  |
| IGF2BP2                  | -3,85 | OPTN                     | -2,93 |  |  |
| RNF13                    | -3,84 | KIF2A                    | -2,91 |  |  |
| gene:ENSSSCG000000004387 | -3,84 | PDGFA                    | -2,90 |  |  |
| MSI2                     | -3,81 | UACA                     | -2,87 |  |  |
| HSPG2                    | -3,79 | SMARCC1                  | -2,86 |  |  |
| OS9                      | -3,79 | ME1                      | -2,85 |  |  |
| DAZAP1                   | -3,78 | DCTN2                    | -2,85 |  |  |
| gene:ENSSSCG000000040990 | -3,78 | EXOC1                    | -2,84 |  |  |
| ZNF609                   | -3,77 | MICU2                    | -2,83 |  |  |
| GOLGB1                   | -3,75 | gene:ENSSSCG000000042436 | -2,82 |  |  |
| LAD1                     | -3,74 | KRT18                    | -2,80 |  |  |
| EMILIN2                  | -3,73 | KRT8                     | -2,79 |  |  |
| EEA1                     | -3,71 | CRK                      | -2,78 |  |  |
| GOLGA4                   | -3,70 | EIF4G3                   | -2,77 |  |  |
| FNDC3A                   | -3,69 | ENAH                     | -2,77 |  |  |
| SLC22A18                 | -3,64 | FNBP1L                   | -2,76 |  |  |
| TRMT10A                  | -3,63 | PPFIBP1                  | -2,75 |  |  |

|                         |       |                         |       |  |  |
|-------------------------|-------|-------------------------|-------|--|--|
| TRIP11                  | -3,63 | ITGB1                   | -2,74 |  |  |
| GFPT1                   | -3,63 | ARHGAP29                | -2,71 |  |  |
| SRBD1                   | -3,63 | GNB1                    | -2,71 |  |  |
| UGP2                    | -3,63 | PPIG                    | -2,71 |  |  |
| ZC3HAV1                 | -3,63 | KTN1                    | -2,70 |  |  |
| ITGB1                   | -3,62 | RRBP1                   | -2,69 |  |  |
| GRN                     | -3,61 | CTSH                    | -2,68 |  |  |
| ENAH                    | -3,57 | gene:ENSSSCG00000008183 | -2,68 |  |  |
| APLP2                   | -3,56 | PTBP3                   | -2,68 |  |  |
| RRBP1                   | -3,55 | CALM3                   | -2,66 |  |  |
| LRPAP1                  | -3,54 | PRC1                    | -2,66 |  |  |
| CEP290                  | -3,54 | FLNB                    | -2,65 |  |  |
| SMARCC1                 | -3,53 | ZRANB2                  | -2,63 |  |  |
| BHLHE41                 | -3,52 | ITPR2                   | -2,62 |  |  |
| MAP1LC3A                | -3,52 | DDX1                    | -2,61 |  |  |
| POLE4                   | -3,49 | NPEPPS                  | -2,60 |  |  |
| SKA2                    | -3,49 | ZNF395                  | -2,57 |  |  |
| SYT11                   | -3,49 | LMO7                    | -2,56 |  |  |
| CAMK2D                  | -3,49 | KLF10                   | -2,55 |  |  |
| VEGFA                   | -3,48 | GOLGB1                  | -2,54 |  |  |
| gene:ENSSSCG00000014909 | -3,47 | ST13                    | -2,53 |  |  |
| SUMF1                   | -3,47 | CDC5L                   | -2,52 |  |  |
| AIRE                    | -3,47 | SLK                     | -2,48 |  |  |
| gene:ENSSSCG00000001924 | -3,47 | gene:ENSSSCG00000034853 | -2,48 |  |  |
| PCM1                    | -3,47 | SUMF1                   | -2,48 |  |  |
| NPNT                    | -3,46 | CENPF                   | -2,47 |  |  |
| PRC1                    | -3,46 | CBX5                    | -2,46 |  |  |
| ME1                     | -3,46 | ERO1A                   | -2,44 |  |  |
| FUOM                    | -3,44 | gene:ENSSSCG00000040827 | -2,44 |  |  |
| UBXN1                   | -3,44 | P4HB                    | -2,43 |  |  |
| ITGA2                   | -3,43 | TGFB1                   | -2,42 |  |  |
| ASPH                    | -3,41 | HSPG2                   | -2,41 |  |  |
| SLK                     | -3,41 | EVI5                    | -2,41 |  |  |
| gene:ENSSSCG00000036274 | -3,41 | ANXA13                  | -2,37 |  |  |
| DLGAP5                  | -3,40 | EIF2A                   | -2,36 |  |  |
| gene:ENSSSCG00000038557 | -3,40 | TAX1BP1                 | -2,36 |  |  |
| ITGB3                   | -3,40 | SRP72                   | -2,35 |  |  |
| SMARCC2                 | -3,40 | DHX40                   | -2,35 |  |  |
| HUWE1                   | -3,39 | COPB2                   | -2,35 |  |  |
| VWA1                    | -3,39 | gene:ENSSSCG00000003903 | -2,35 |  |  |
| EFNB1                   | -3,38 | GLUD1                   | -2,32 |  |  |

|                         |       |                         |       |  |  |
|-------------------------|-------|-------------------------|-------|--|--|
| PTPRF                   | -3,38 | FXR1                    | -2,32 |  |  |
| EPCAM                   | -3,36 | CFDP1                   | -2,30 |  |  |
| CXCL14                  | -3,35 | NUCKS1                  | -2,30 |  |  |
| FN1                     | -3,34 | CPD                     | -2,30 |  |  |
| ACSL4                   | -3,34 | SEPTIN7                 | -2,29 |  |  |
| SMS                     | -3,33 | CCN3                    | -2,28 |  |  |
| gene:ENSSSCG00000038144 | -3,32 | gene:ENSSSCG00000035209 | -2,28 |  |  |
| CPNE3                   | -3,31 | gene:ENSSSCG00000016330 | -2,26 |  |  |
| DEPDC1B                 | -3,31 | CCDC80                  | -2,26 |  |  |
| OPTN                    | -3,27 | BHLHE41                 | -2,26 |  |  |
| CCDC47                  | -3,25 | FLNA                    | -2,25 |  |  |
| PPP2R3C                 | -3,25 | PNISR                   | -2,25 |  |  |
| DST                     | -3,25 | RSF1                    | -2,23 |  |  |
| CDH6                    | -3,23 | SUCLG2                  | -2,21 |  |  |
| TCEA3                   | -3,21 | gene:ENSSSCG00000000697 | -2,21 |  |  |
| PAPSS1                  | -3,20 | gene:ENSSSCG00000033497 | -2,17 |  |  |
| ERO1A                   | -3,20 | gene:ENSSSCG00000007322 | -2,17 |  |  |
| DSP                     | -3,18 | gene:ENSSSCG00000017164 | -2,14 |  |  |
| BAZ1B                   | -3,17 | VIM                     | -2,13 |  |  |
| AP2M1                   | -3,16 | PTGES                   | -2,10 |  |  |
| LAMP1                   | -3,14 | EPCAM                   | -2,10 |  |  |
| CAP1                    | -3,13 | HK1                     | -2,10 |  |  |
| gene:ENSSSCG00000040337 | -3,13 | ANKRD12                 | -2,06 |  |  |
| ADAM9                   | -3,13 | RDX                     | -2,06 |  |  |
| VPS35                   | -3,12 | LDHA                    | -2,04 |  |  |
| BCAM                    | -3,10 | RBPJ                    | -2,03 |  |  |
| DHX40                   | -3,09 | PDIA3                   | -1,97 |  |  |
| CPD                     | -3,08 |                         |       |  |  |
| TUBB2B                  | -3,07 |                         |       |  |  |
| RBBP7                   | -3,06 |                         |       |  |  |
| RSF1                    | -3,04 |                         |       |  |  |
| gene:ENSSSCG00000002825 | -3,03 |                         |       |  |  |
| VIRMA                   | -3,03 |                         |       |  |  |
| CETN3                   | -2,99 |                         |       |  |  |
| SHTN1                   | -2,99 |                         |       |  |  |
| AP2B1                   | -2,99 |                         |       |  |  |
| PTGES                   | -2,98 |                         |       |  |  |
| VDAC1                   | -2,96 |                         |       |  |  |
| CLGN                    | -2,96 |                         |       |  |  |
| COPB2                   | -2,96 |                         |       |  |  |
| TPP1                    | -2,96 |                         |       |  |  |

|                          |       |  |  |  |  |
|--------------------------|-------|--|--|--|--|
| CHD9                     | -2,96 |  |  |  |  |
| CMIP                     | -2,96 |  |  |  |  |
| CCDC181                  | -2,95 |  |  |  |  |
| KRT14                    | -2,94 |  |  |  |  |
| PLEC                     | -2,94 |  |  |  |  |
| PDGFA                    | -2,94 |  |  |  |  |
| RAB6A                    | -2,93 |  |  |  |  |
| COPA                     | -2,93 |  |  |  |  |
| TM9SF4                   | -2,92 |  |  |  |  |
| GLG1                     | -2,90 |  |  |  |  |
| gene:ENSSSCG00000016330  | -2,90 |  |  |  |  |
| ZNF395                   | -2,90 |  |  |  |  |
| CCDC88A                  | -2,86 |  |  |  |  |
| NUCKS1                   | -2,84 |  |  |  |  |
| PRKCSH                   | -2,83 |  |  |  |  |
| RDX                      | -2,83 |  |  |  |  |
| TLN1                     | -2,83 |  |  |  |  |
| F3                       | -2,82 |  |  |  |  |
| FLNA                     | -2,80 |  |  |  |  |
| P4HA2                    | -2,80 |  |  |  |  |
| USP8                     | -2,80 |  |  |  |  |
| FLNB                     | -2,80 |  |  |  |  |
| gene:ENSSSCG00000017783  | -2,78 |  |  |  |  |
| gene:ENSSSCG000000035209 | -2,78 |  |  |  |  |
| PMEPA1                   | -2,76 |  |  |  |  |
| EVI5                     | -2,76 |  |  |  |  |
| HADHA                    | -2,75 |  |  |  |  |
| PSME1                    | -2,74 |  |  |  |  |
| BCAT1                    | -2,71 |  |  |  |  |
| TAX1BP1                  | -2,71 |  |  |  |  |
| PHACTR4                  | -2,70 |  |  |  |  |
| TTC3                     | -2,70 |  |  |  |  |
| gene:ENSSSCG00000007314  | -2,70 |  |  |  |  |
| BAIAP2                   | -2,69 |  |  |  |  |
| HDAC7                    | -2,69 |  |  |  |  |
| CBX5                     | -2,67 |  |  |  |  |
| CENPF                    | -2,66 |  |  |  |  |
| gene:ENSSSCG000000017164 | -2,64 |  |  |  |  |
| APP                      | -2,61 |  |  |  |  |
| BRD7                     | -2,61 |  |  |  |  |
| SMC3                     | -2,60 |  |  |  |  |



|                          |       |  |  |  |  |
|--------------------------|-------|--|--|--|--|
| SUPT3H                   | -2,58 |  |  |  |  |
| RBPJ                     | -2,57 |  |  |  |  |
| FNDC3B                   | -2,56 |  |  |  |  |
| SEPTIN10                 | -2,55 |  |  |  |  |
| TOP2B                    | -2,55 |  |  |  |  |
| H2AC20                   | -2,54 |  |  |  |  |
| gene:ENSSSCG00000022032  | -2,54 |  |  |  |  |
| AP1B1                    | -2,54 |  |  |  |  |
| LAP3                     | -2,53 |  |  |  |  |
| CST6                     | -2,52 |  |  |  |  |
| GPD2                     | -2,52 |  |  |  |  |
| NAPIL1                   | -2,50 |  |  |  |  |
| FZD5                     | -2,49 |  |  |  |  |
| SUCLG2                   | -2,49 |  |  |  |  |
| P4HB                     | -2,49 |  |  |  |  |
| FZD6                     | -2,48 |  |  |  |  |
| RNF181                   | -2,48 |  |  |  |  |
| gene:ENSSSCG00000048341  | -2,47 |  |  |  |  |
| TUSC3                    | -2,47 |  |  |  |  |
| WFDC2                    | -2,47 |  |  |  |  |
| NDFIP1                   | -2,46 |  |  |  |  |
| PTPN11                   | -2,45 |  |  |  |  |
| gene:ENSSSCG00000000261  | -2,44 |  |  |  |  |
| SEC63                    | -2,43 |  |  |  |  |
| UQCRC1                   | -2,43 |  |  |  |  |
| EIF4G3                   | -2,42 |  |  |  |  |
| NANS                     | -2,42 |  |  |  |  |
| HSPD1                    | -2,42 |  |  |  |  |
| DDX6                     | -2,42 |  |  |  |  |
| gene:ENSSSCG000000000697 | -2,41 |  |  |  |  |
| gene:ENSSSCG00000040827  | -2,41 |  |  |  |  |
| HSP90B1                  | -2,41 |  |  |  |  |
| PPP1R12A                 | -2,41 |  |  |  |  |
| H1-0                     | -2,40 |  |  |  |  |
| GLUD1                    | -2,40 |  |  |  |  |
| RAB10                    | -2,39 |  |  |  |  |
| SORBS2                   | -2,38 |  |  |  |  |
| SCD                      | -2,38 |  |  |  |  |
| PNISR                    | -2,37 |  |  |  |  |
| BCL2L1                   | -2,37 |  |  |  |  |
| PDLIM7                   | -2,37 |  |  |  |  |

|                         |       |  |  |  |  |
|-------------------------|-------|--|--|--|--|
| VIM                     | -2,37 |  |  |  |  |
| MAP4K4                  | -2,36 |  |  |  |  |
| CCDC186                 | -2,35 |  |  |  |  |
| gene:ENSSSCG00000033385 | -2,33 |  |  |  |  |
| CAST                    | -2,33 |  |  |  |  |
| gene:ENSSSCG00000005518 | -2,32 |  |  |  |  |
| MEST                    | -2,32 |  |  |  |  |
| ATP5F1A                 | -2,31 |  |  |  |  |
| RNF19A                  | -2,31 |  |  |  |  |
| ANKRD12                 | -2,30 |  |  |  |  |
| DYNC1LI2                | -2,30 |  |  |  |  |
| LGALS1                  | -2,30 |  |  |  |  |
| ICAM1                   | -2,28 |  |  |  |  |
| CANX                    | -2,28 |  |  |  |  |
| LDHA                    | -2,28 |  |  |  |  |
| CSDE1                   | -2,28 |  |  |  |  |
| SEPTIN7                 | -2,27 |  |  |  |  |
| MXI1                    | -2,26 |  |  |  |  |
| TMEM50A                 | -2,25 |  |  |  |  |
| LY6D                    | -2,25 |  |  |  |  |
| EIF4B                   | -2,23 |  |  |  |  |
| P4HA1                   | -2,23 |  |  |  |  |
| BAZ2A                   | -2,23 |  |  |  |  |
| EEF1G                   | -2,23 |  |  |  |  |
| SMARCE1                 | -2,22 |  |  |  |  |
| CARHSP1                 | -2,22 |  |  |  |  |
| HSP90AB1                | -2,21 |  |  |  |  |
| gene:ENSSSCG00000038594 | -2,20 |  |  |  |  |
| gene:ENSSSCG00000049831 | -2,18 |  |  |  |  |
| MAP1B                   | -2,18 |  |  |  |  |
| NIPBL                   | -2,18 |  |  |  |  |
| ST13                    | -2,16 |  |  |  |  |
| PSIP1                   | -2,15 |  |  |  |  |
| ARPC2                   | -2,15 |  |  |  |  |
| MSN                     | -2,14 |  |  |  |  |
| VPS28                   | -2,13 |  |  |  |  |
| ALDOA                   | -2,13 |  |  |  |  |
| LMO7                    | -2,12 |  |  |  |  |
| METAP2                  | -2,10 |  |  |  |  |
| PARK7                   | -2,09 |  |  |  |  |
| TOP2A                   | -2,07 |  |  |  |  |

|                         |       |  |  |  |  |
|-------------------------|-------|--|--|--|--|
| AKAP9                   | -2,04 |  |  |  |  |
| gene:ENSSSCG00000039658 | -2,03 |  |  |  |  |
| gene:ENSSSCG00000001930 | -2,02 |  |  |  |  |
| EIF3F                   | -2,02 |  |  |  |  |
| GAPDH                   | -2,01 |  |  |  |  |
| DYNC1I2                 | -2,01 |  |  |  |  |
| S100A4                  | -1,98 |  |  |  |  |
| PPIG                    | -1,98 |  |  |  |  |
| RPL6                    | -1,93 |  |  |  |  |
| RPS6                    | -1,78 |  |  |  |  |

Fold change of gene expression in infected cells comparing to control (mock-infected cells).
