# Supplementary material for: Porcine Circovirus Modulates Swine Influenza Virus Replication in Pig Tracheal Epithelial Cells and Porcine Alveolar Macrophages
Source: MDPI journal article supplement (doi:10.3390/v15051207), 2023-05-20
Supplement: s1 [file s1]

**Supplemental Table S1. List of primers and probe used for PCV2b quantification and primers used in RT-qPCR for cytokines mRNA quantification in NPTr and iPAM 3D4/21 cells**

| Target        | Primers and probes 5'- 3'                                                                                                       | References |
|---------------|---------------------------------------------------------------------------------------------------------------------------------|------------|
| PCV2 (ORF1)   | F: GGC CAC CTG GGT GTG GTA AA<br>R: CCC ACC ACT TGT TTC TAG GTG GTT<br>Probe 6-FAM-TTT GCA GAC CCG GAA ACC ACA TAC TGG A-BHQ-1) | [11]       |
| IL-6          | F: ACTCCCTCTCCACAAGCGCCTT<br>R: TGGCATCTTCTTCCAGGCGTCCC                                                                         | [53]       |
| IL-8          | F: TGTGAGGCTGCAGTTCTGGCAAG<br>R: GGGTGGAAGGTGTGGAATGCGT                                                                         |            |
| IL-10         | F: GCTGCGGCGCTGTCATCAATT<br>R: ACCCATGGCTTTGTAGACACCCC                                                                          |            |
| IFN- $\alpha$ | F: ACTCCATCCTGGCTGTGAGGAAAT<br>R: TCTGTCTTGCAGGTTTGTGGAGGA                                                                      |            |
| IFN- $\beta$  | F: CTCTCCTGATGTGTTTCTCC<br>R: GTTCATCCTATCTTCGAGGC                                                                              | [54]       |
| IFN- $\gamma$ | F: GAGCCAAATTGTCTCCTTCTAC<br>R: CGAAGTCATTCAGTTTCCCAG                                                                           |            |
| B2M           | F: GTGCTATCTCCACGTTTGAG<br>R: GCTTCGAGTGCAAGAGATTG                                                                              |            |
| B-actin       | F: ACCACTGGCATTGTCATGGACTCT<br>R: ATCTTCATGAGGTAGTCGGTCAGG                                                                      |            |
| PPIA          | F: TGCAGACAAAGTTCCAAAGACAG<br>R: GCCACCAGTGCCATTATGG                                                                            |            |
