# Supplementary material for: Porcine Circovirus Modulates Swine Influenza Virus Replication in Pig Tracheal Epithelial Cells and Porcine Alveolar Macrophages
Source: Viruses. 2023 May 20;15(5):1207. doi: 10.3390/v15051207 (PMC10222781; doi:10.3390/v15051207)
Supplement: Supplementary file 1 [file viruses-15-01207-s001.zip]

Archive with 6 entries (6 files):
- Supplemental Figures.pdf
- Supplemental Table S1.  List of primers .pdf
- Supplemental Table S2. Up-rgulated genes in NPTr cells.pdf
- Supplemental Table S3. Down-rgulated genes in NPTr cells.pdf
- Supplemental Table S4. Up-rgulated genes in iPAM .pdf
- Supplemental Table S5. Down-rgulated genes in iPAM.pdf
